# Supplementary material for: A fluorescent probe for Cd2+ detection based on the aggregation-induced emission enhancement of aqueous Zn–Ag–In–S quantum dots
Source: Royal Society of Chemistry journal article supplement (doi:10.1039/c9ay00716d), 2019-01-01
Supplement: c9ay00716d1.pdf [file c9ay00716d1.pdf]

## Supporting Information

### **A fluorescent probe for Cd<sup>2+</sup> detection based on aggregation-induced emission enhancement of aqueous Zn-Ag-In-S quantum dots**

Chang Wei,<sup>a</sup> Xian Wei,<sup>a</sup> Zhe Hu,<sup>a</sup> Dan Yang,<sup>a</sup> Shiliang Mei,<sup>a</sup> Guilin Zhang,<sup>a</sup> Danlu Su,<sup>a</sup> Wanlu Zhang,<sup>\*a</sup> and Ruiqian Guo <sup>\*a, b</sup>

a. Engineering Research Center of Advanced Lighting Technology, Ministry of Education, Institute for Electric Light Sources, Fudan University, Shanghai, 200433, China.

b. Institute of Future Lighting, Academy for Engineering and Technology, Fudan University, Shanghai, 200433, China.

\* Corresponding author

Email: fdwlzhang@fudan.edu.cn; rqguo@fudan.edu.cn.

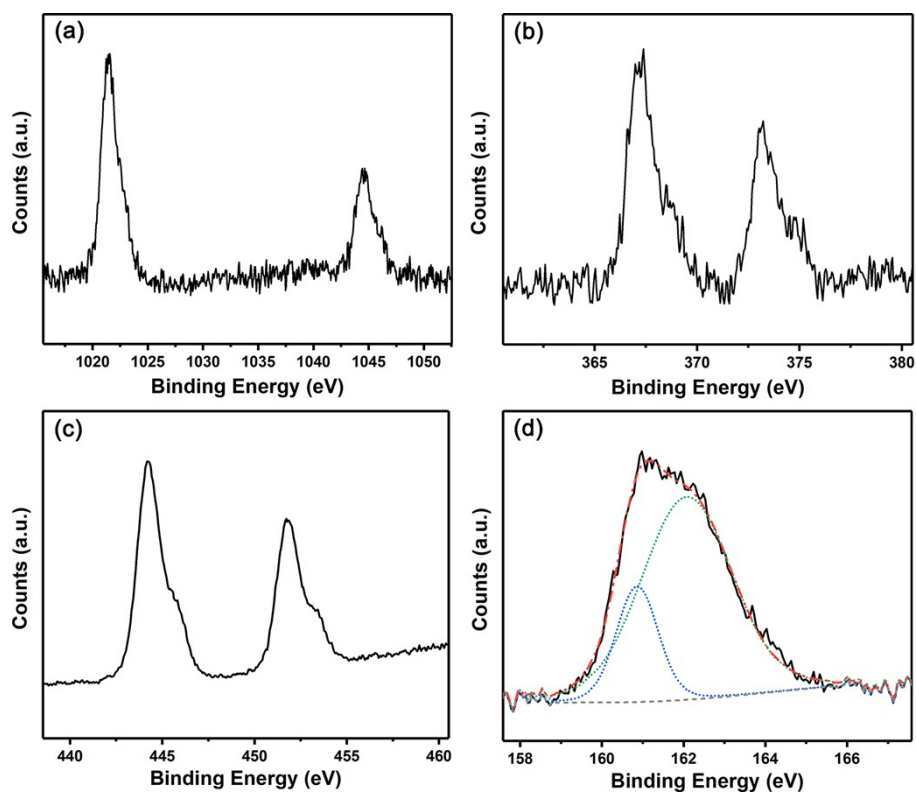

**Fig. S1** XPS spectra of (a) Zn 2p, (b) Ag 3d, (c) In 3d, (d) S 2p of ZAIS QDs.

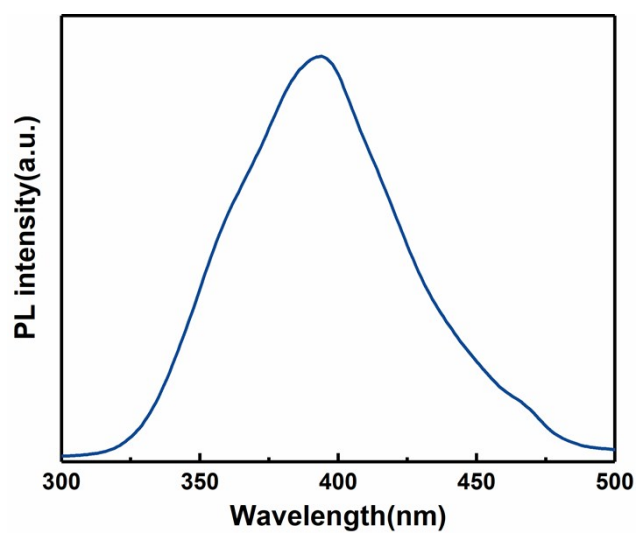

**Fig. S2** Excitation spectrum of ZAIS QDs (monitored at emission wavelength of 525 nm).

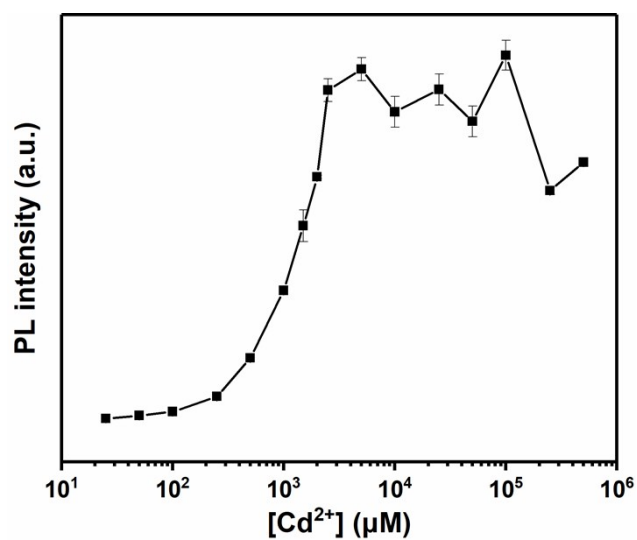

**Fig. S3** PL intensity of ZAIS QDs with Cd<sup>2+</sup> of different concentrations added (from 25 μM to 500 mM). The x-axis is logarithmic.

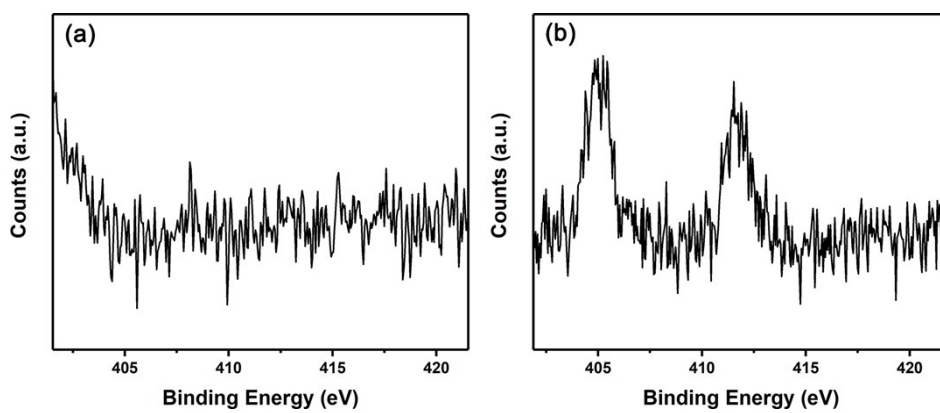

**Fig. S4** XPS spectra of Cd 3d (a) before adding Cd<sup>2+</sup> (b) after adding Cd<sup>2+</sup> of 2 mM.

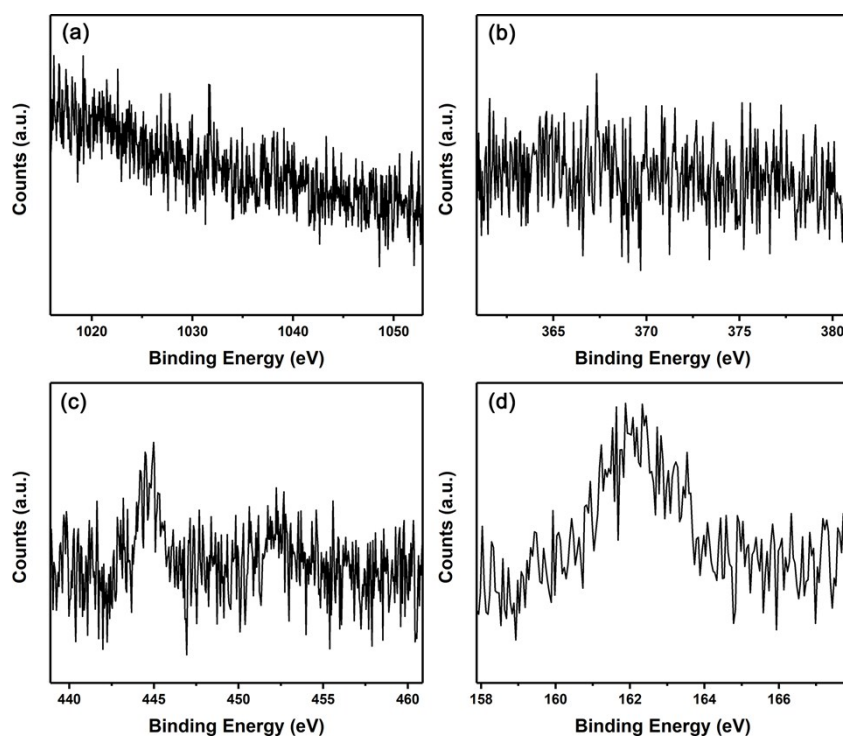

**Fig. S5** XPS spectra of (a) Zn 2p, (b) Ag 3d, (c) In 3d, (d) S 2p of ZAIS QDs after adding  $\text{Cd}^{2+}$  of 2 mM.

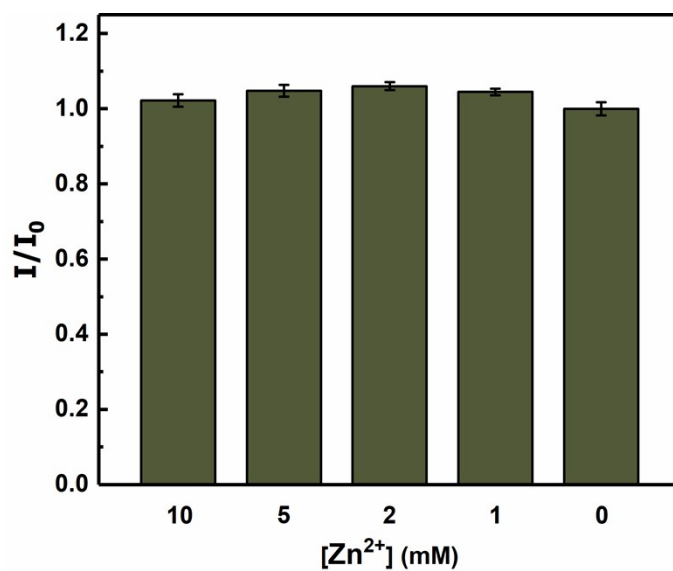

**Fig. S6** Effect of  $\text{Zn}^{2+}$  of different concentrations on the PL response of ZAIS QDs.
